# Supplementary material for: Supramolecular polysulfide polymers cross-linked by metal–ligand interactions
Source: Royal Society of Chemistry journal article supplement (doi:10.1039/d3py00151b), 2023-01-01
Supplement: d3py00151b1.pdf [file d3py00151b1.pdf]

Supporting Information for

**Supramolecular polysulfide polymers cross-linked by metal-ligand interactions**

Yuichiro Kobayashi,\* Daiki Kitano, Ryuto Nishimura, Yuki Yamagishi, Akiyoshi

Horiguchi, and Hiroyasu Yamaguchi\*

Department of Macromolecular Science, Graduate School of Science, Osaka University,  
Japan.

Innovative Catalysis Science Division, Institute for Open and Transdisciplinary Research  
Initiatives (ISC-OTRI), Osaka University, Japan

Project Research Center for Fundamental Sciences, Graduate School of Science, Osaka  
University, Toyonaka, Osaka 560-0043, Japan

\* To whom corresponding should be addressed

E-mail: kobayashiyl1@chem.sci.osaka-u.ac.jp

hiroyasu@chem.sci.osaka-u.ac.jp

## Table of Contents

|                                                        |    |
|--------------------------------------------------------|----|
| General Information .....                              | 3  |
| 1. Preparation of poly(LS-bpy) .....                   | 4  |
| 2. Preparation of poly(LS-bpyCu) .....                 | 7  |
| 3. Preparation of LS-Bn .....                          | 11 |
| 4. Preparation of poly(LS-bpyFe) .....                 | 15 |
| 5. Disassembly and re-assembly of poly(LS-bpyCu) ..... | 20 |
| 6. DSC and TGA of poly(LS-bpyCu) .....                 | 21 |

## General information

### Materials.

All of the reagents and chemicals used were obtained from commercial sources, unless otherwise noted. Sulfur was purified by recrystallization from carbon disulfide.

### Measurements.

The NMR spectra were obtained using a JEOL JNM-ECS 400 and 500 MHz NMR spectrometer. MALDI-TOF MS spectra were recorded in the linear positive mode on a mass spectrometer (BRUKER DALTONICS, Ultraflex III and autoflex maX). 2,5-Dihydroxybenzoic acid was used as a matrix. The molecular weights of the polymers were determined by gel permeation chromatography (GPC) measurements. GPC measurements were performed with 10 mmol LiBr in DMSO ( $0.40 \text{ mL} \cdot \text{min}^{-1}$ ,  $40 \text{ }^\circ\text{C}$ ) using a TOSOH HLC-8320GPC EcoSEC® (TOSOH, Tokyo, Japan) equipped with a TOSOH TSK gel  $\alpha$ -M column. UV-Vis measurements were performed using a JASCO V-650 spectrometer at room temperature. The thermogravimetric analysis was carried out from room temperature to  $500 \text{ }^\circ\text{C}$  at a heating rate of  $10 \text{ }^\circ\text{C min}^{-1}$  using a Rigaku Instrument Thermo Plus TG8120 in a  $\text{N}_2$  atmosphere. Differential scanning calorimetry (DSC) was carried out with a Seiko Instruments DSC 6220 under a  $\text{N}_2$  atmosphere and  $10 \text{ K min}^{-1}$  heating rate. Pyrolysis-GC-MS analysis was performed using a PY-2020iD pyrolyser (Frontier Laboratories Ltd.) connected to 6890 GC (Agilent Technologies International Japan, Ltd.) and JMS700 MS (JEOL). Pyrolysis was performed at a temperature of  $100 \text{ }^\circ\text{C}$ . The purge flow of nitrogen to remove any oxygen from the sample, prior to pyrolysis, was set to  $20 \text{ ml/min}$ . The mass spectrometer ion source was set to  $230 \text{ }^\circ\text{C}$  and the interface to  $280 \text{ }^\circ\text{C}$ , scanning took place once per second in the range of 30 to 300 m/z..

## 1. Preparation of poly(LS-bpy)

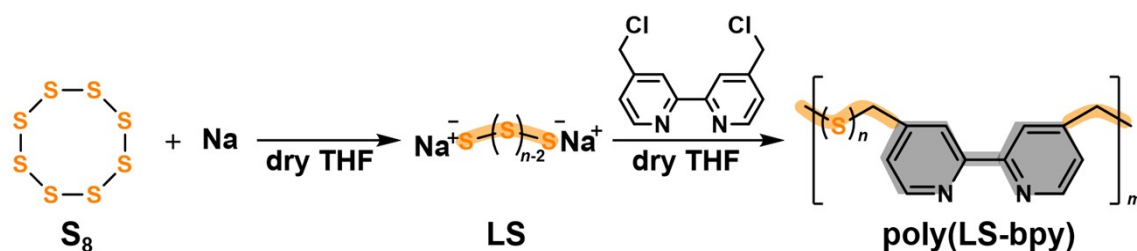

**Scheme S1.** Preparation of poly(LS-bpy).

Sulfur ( $\text{S}_8$ ) (1500 mg, 5.85 mmol) and sodium (Na) (278 mg, 12.1 mmol) were added to dry THF (60 mL) and the mixture was stirred at 75 °C for 24 h. 4-(Chloromethyl)-4'-methyl-2,2'-bipyridyl (bpydiCl) (1720 mg, 6.81 mmol) was added to the suspension and the mixture was stirred at r.t. for 24 h. The resulting solution was filtered,  $\text{H}_2\text{O}$  and  $\text{CHCl}_3$  were added to the filtrate, and the  $\text{CHCl}_3$  layer was extracted. After drying the  $\text{CHCl}_3$  with  $\text{MgSO}_4$ , the solution was filtered and filtrate was evaporated. The resulting sample was purified by separation GPC to obtain poly(LS-bpy). (40% Yield from  $\text{S}_8$ )

**Table S1. Preparation of poly(LS-bpy)**

|       | $\text{S}_8$ | Na          | $\text{S}_8 : \text{Na}$ | bpydiCl     | S in         | Yield | $M_n$ |
|-------|--------------|-------------|--------------------------|-------------|--------------|-------|-------|
|       | (mg / mmol)  | (mg / mmol) |                          | (mg / mmol) | poly(LS-bpy) | (%)   |       |
| Run 1 | 1500 / 5.86  | 278 / 12.0  | 1 : 2                    | 1720 / 6.80 | 41           | 40    | 2,500 |
| Run 2 | 500 / 1.95   | 137 / 5.96  | 1 : 3                    | 726 / 2.87  | 34           | 32    | 2,700 |
| Run 3 | 200 / 0.78   | 73 / 3.17   | 1 : 4                    | 870 / 3.44  | 29           | 46    | 2,600 |
| Run 4 | 200 / 0.78   | 144 / 6.25  | 1 : 8                    | 1739 / 6.88 | 22           | 51    | 1,600 |
| Run 5 | 500 / 3.94   | 89 / 3.91   | 1 : 2                    | 741 / 2.93  | 40           | 28    | 2,600 |
| Run 6 | 500 / 3.94   | 92 / 4.00   | 1 : 2                    | 988 / 3.91  | 38           | 41    | 2,700 |
| Run 7 | 500 / 3.94   | 91 / 3.94   | 1 : 2                    | 1482 / 5.86 | 34           | 40    | 2,200 |

Data of poly(LS-bpy).

Physical State; Yellow powder.

Anal. Calcd. for  $(C_{12}H_{10}N_2S_4)_n$  : C 46.42, H 3.25, N 9.02, S 41.12 Found: C 46.67, H 3.39, N 8.82, S 41.31.

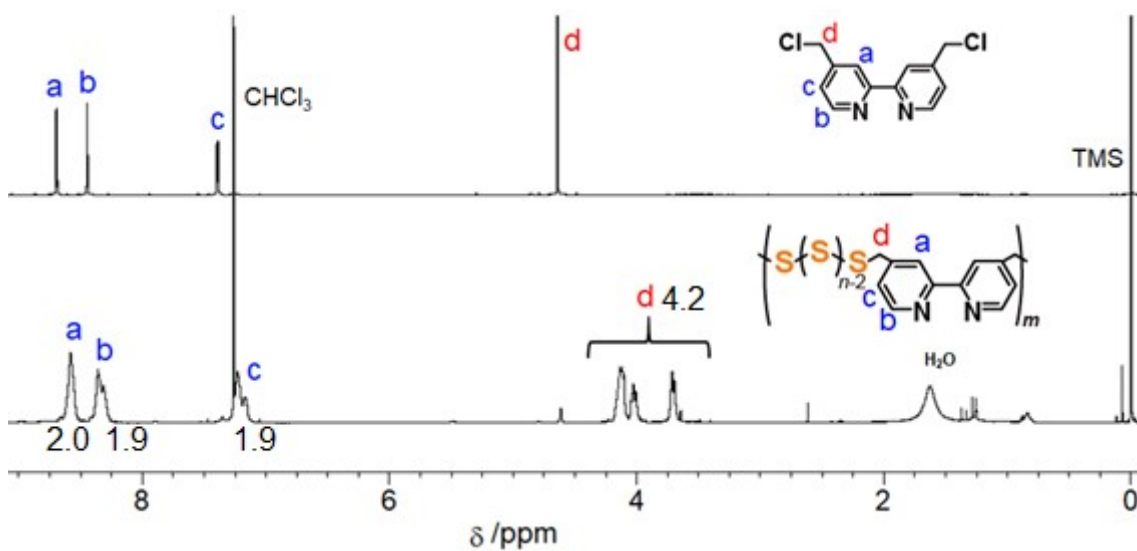

**Figure S1.**  $^1\text{H}$  NMR spectra of **bpydiCl** (upper) and **poly(LS-bpy)** (bottom) in  $\text{CDCl}_3$  at  $30^\circ\text{C}$ .

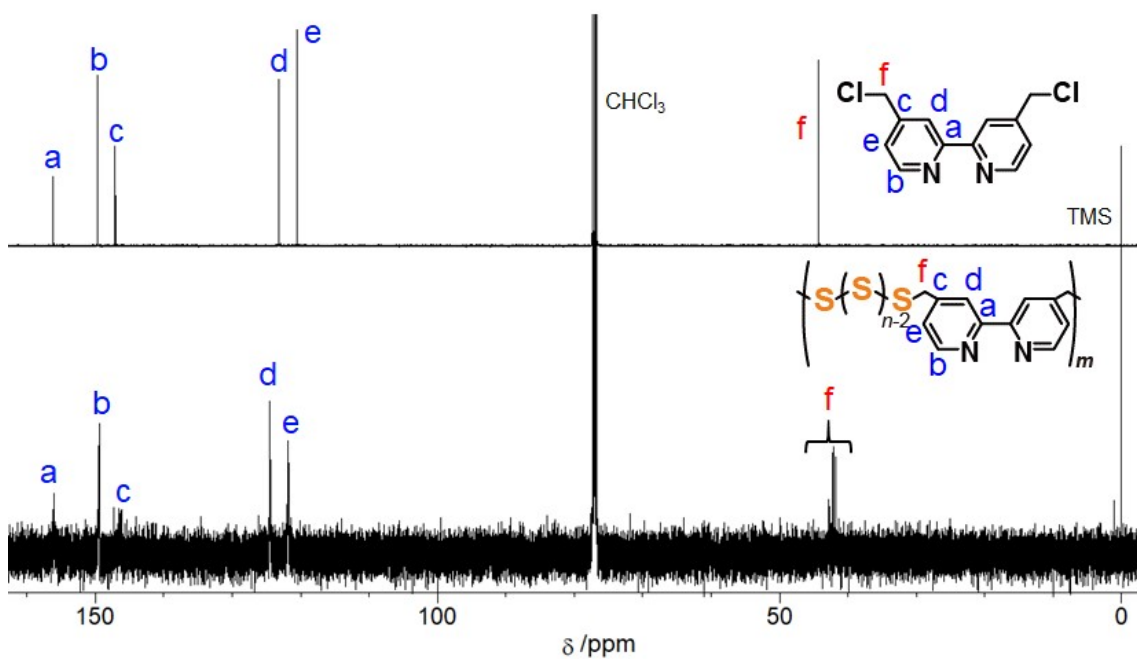

**Figure S2.**  $^{13}\text{C}$  NMR spectra of **bpydiCl** (upper) and **poly(LS-bpy)** (bottom) in  $\text{CDCl}_3$  at  $30^\circ\text{C}$ .

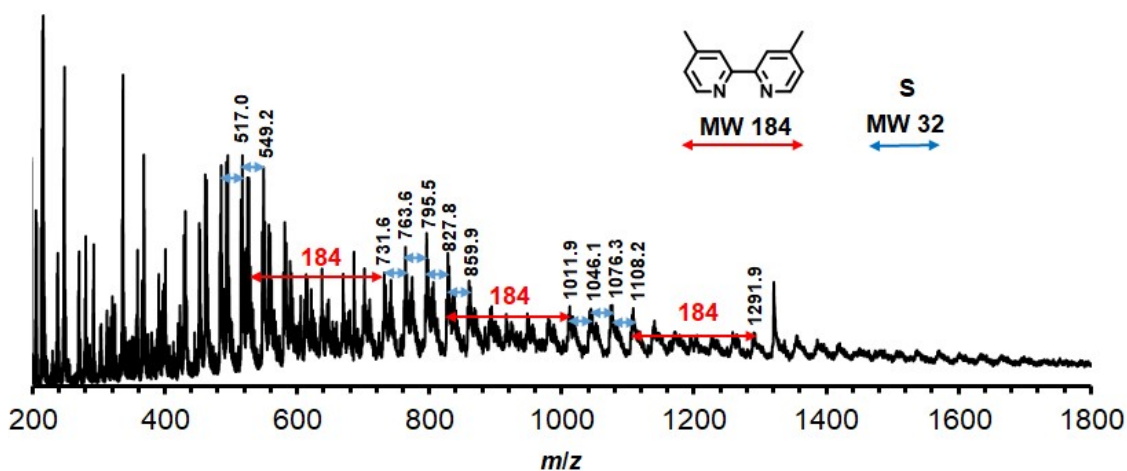

**Figure S3.** MALDI-TOF MS spectrum of poly(LS-bpy). Peaks for a number of the repeating unit of bpy ( $m/z$  184) and sulfur (32) could be detected.

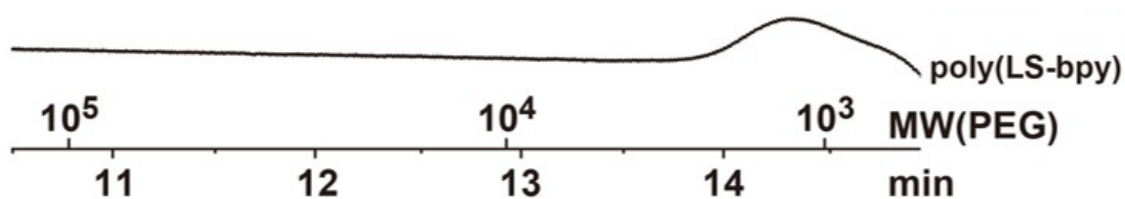

**Figure S4.** GPC profiles of poly(LS-bpy). The GPC measurement was performed in 0.1 wt% LiBr in DMSO solution at 40 °C. Molecular weight are based on the calibration of polyethylene glycol (PEG) standard.

## 2. Preparation of poly(LS-bpyCu)

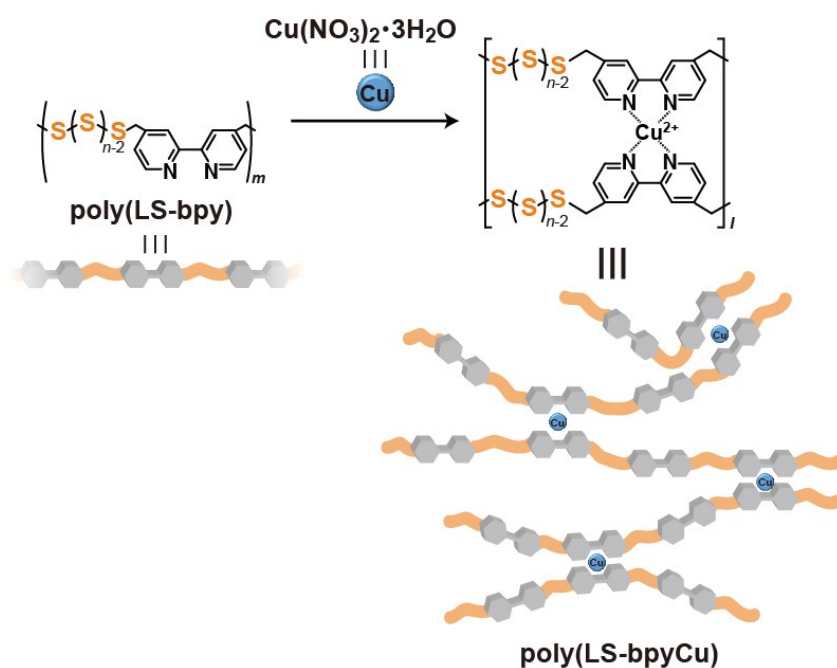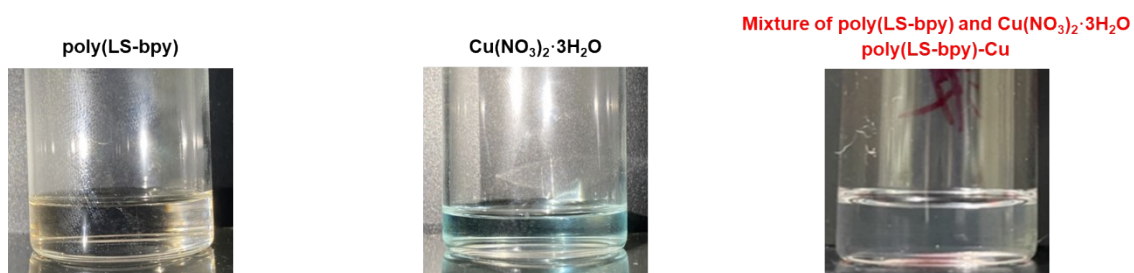

**Scheme S2.** Preparation of poly(LS-bpyCu).

Poly(LS-bpy) (3.3 mg, 10.4  $\mu\text{mol}$  (bpy part)) and copper(II) nitrate pentahydrate [ $\text{Cu(NO}_3)_2 \cdot 5\text{H}_2\text{O}$ ] (1.3 mg, 5.2  $\mu\text{mol}$ ) were added to mixed solution of  $\text{CHCl}_3$  (16.0 mL) and MeOH (4.0 mL), stirred at r.t. for 24 h, and the solution was removed to obtain poly(LS-(bpyCu)).

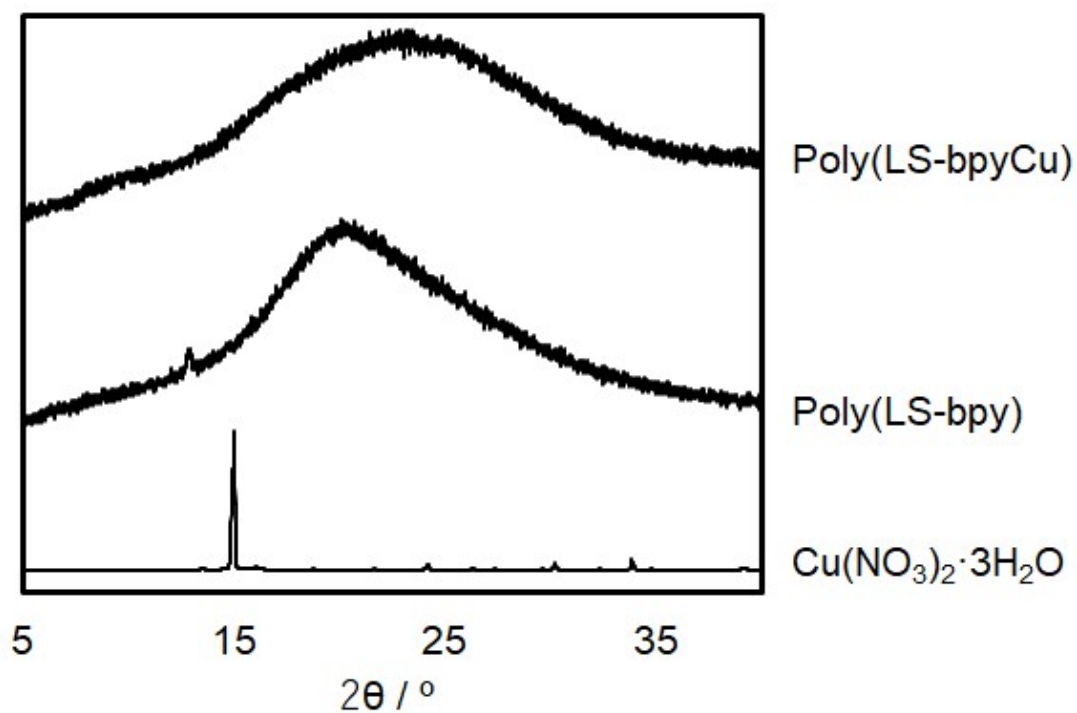

**Figure S5.** XRD patterns of  $\text{Cu}(\text{NO}_3)_2 \cdot 5\text{H}_2\text{O}$ , poly(LS-bpy), and poly(LS-bpyCu). Introduction of Cu(II) into the poly(LS-bpy) was confirmed by the absence of diffraction peaks for neat  $\text{Cu}(\text{NO}_3)_2 \cdot 5\text{H}_2\text{O}$  in the XRPD measurement of poly(LS-bpyCu).



## UV-Vis measurement

### Poly(LS-bpyCu)

To confirm the complex formation of bpy part in poly(LS-bpy) and Cu(II), we performed the UV-Vis measurement of mixture of poly(LS-bpy) and  $\text{Cu}(\text{NO}_3)_2 \cdot 3\text{H}_2\text{O}$ . Mixed solution of  $\text{CHCl}_3$  and MeOH (4:1) of  $46.7 \mu\text{M}$  poly(LS-bpy) was prepared in a UV cuvette (1 cm path length). Aliquots ( $2.67 \mu\text{L}$ ) of the mixed solution of  $\text{CHCl}_3$  and MeOH (4:1) solution of  $10.5 \text{ mM}$   $\text{Cu}(\text{NO}_3)_2 \cdot 3\text{H}_2\text{O}$  were added to the solution of poly(LS-bpy) in the UV cuvette. After each aliquot addition, the solution was allowed to stand until the absorbance reached a constant value. A new peak appeared at  $308 \text{ nm}$  due to the addition of  $\text{Cu}(\text{NO}_3)_2 \cdot 3\text{H}_2\text{O}$  (Fig. S5). This peak was also observed in mixture of bpy and  $\text{Cu}(\text{NO}_3)_2 \cdot 3\text{H}_2\text{O}$  (Fig. S6). These results indicate that poly(LS-bpy) forms a complex by the coordination bond between bpy in poly(LS-bpy)<sub>2</sub> and Cu(II).

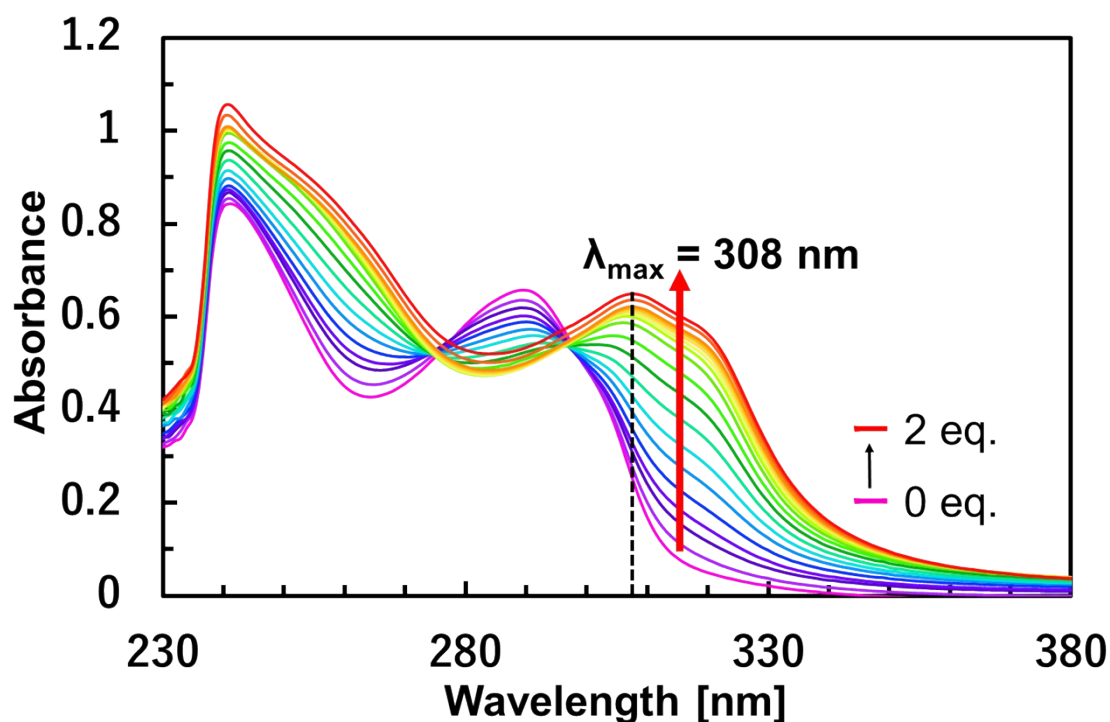

**Figure S6.** UV-Vis absorption spectra of addition of aliquots ( $2.67 \mu\text{L}$ ) of  $10.5 \text{ mM}$   $\text{Cu}(\text{NO}_3)_2 \cdot 3\text{H}_2\text{O}$   $\text{CHCl}_3/\text{MeOH}$  (4:1) solution to the  $46.7 \mu\text{M}$  poly(LS-bpy)  $\text{CHCl}_3/\text{MeOH}$  (4:1) solution at  $25 \text{ }^\circ\text{C}$ .

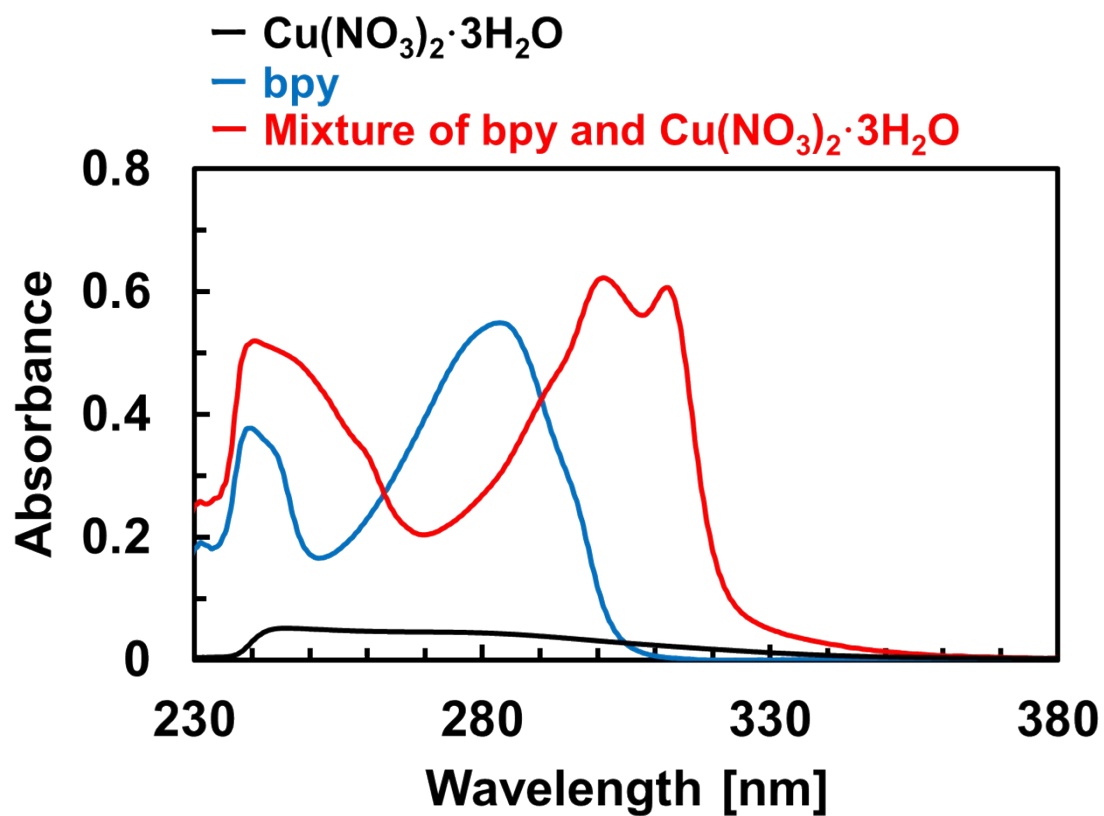

**Figure S7.** UV-Vis spectra of  $\text{Cu}(\text{NO}_3)_2 \cdot 3\text{H}_2\text{O}$  (black),  $\text{bpy}$  (blue), and mixture of  $\text{bpy}$  and  $\text{Cu}(\text{NO}_3)_2 \cdot 3\text{H}_2\text{O}$  (red) in  $\text{CHCl}_3/\text{MeOH}$  (4:1) at 25 °C. The concentrations of  $\text{bpy}$  and  $\text{Cu}(\text{NO}_3)_2 \cdot 3\text{H}_2\text{O}$  were 40  $\mu\text{M}$  and 14  $\mu\text{M}$ , respectively.

### 3. Preparation of LS-Bn

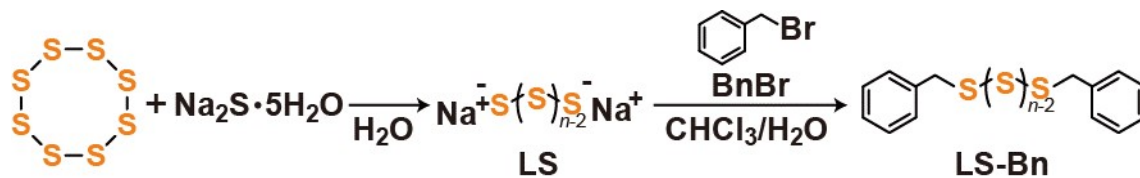

**Scheme S3.** Preparation of LS-Bn.

S<sub>8</sub> (169.7 mg, 1.01 mmol) and benzyl bromide (BnBr, 480 μL, 4.04 mmol) were dissolved in a Na<sub>2</sub>S · 5H<sub>2</sub>O aqueous solution and CHCl<sub>3</sub>, respectively. The two solutions were mixed and stirred at r.t. for 24 h. After the reaction, CHCl<sub>3</sub> was extracted and purified by silica column chromatography to obtain LS-Bn.

Data of LS-Bn.

Physical State; Orange oil.

Anal. Calcd. for C<sub>14</sub>H<sub>14</sub>S<sub>3</sub>: C 60.39, H 5.07, S 34.54, Found: C 60.19, H 5.02, S 34.23.

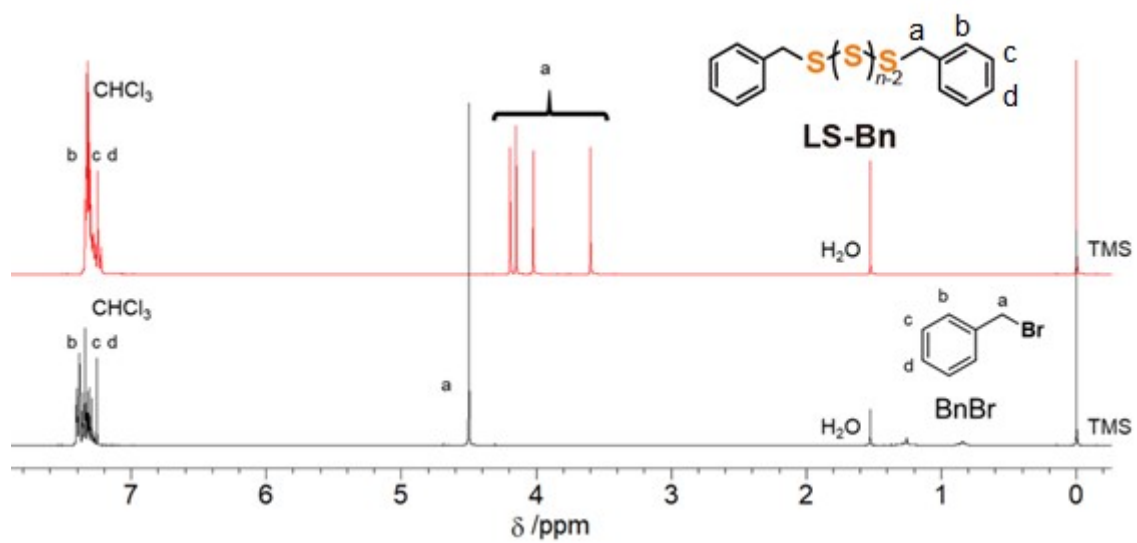

**Figure S8.**  $^1\text{H}$  NMR spectra of LS-Bn (red) and BnBr (black).

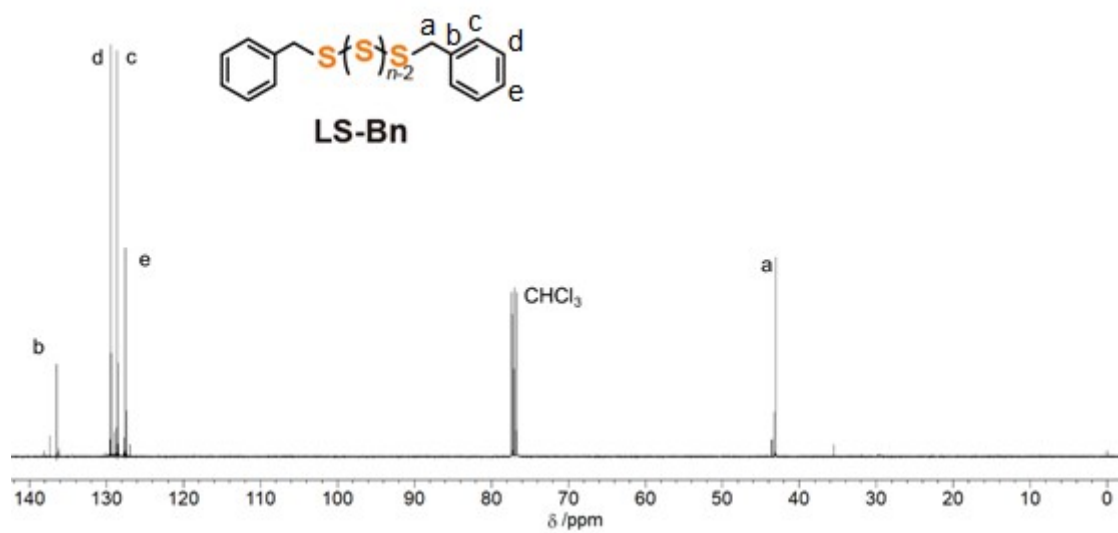

**Figure S9.**  $^{13}\text{C}$  NMR spectrum of LS-Bn.

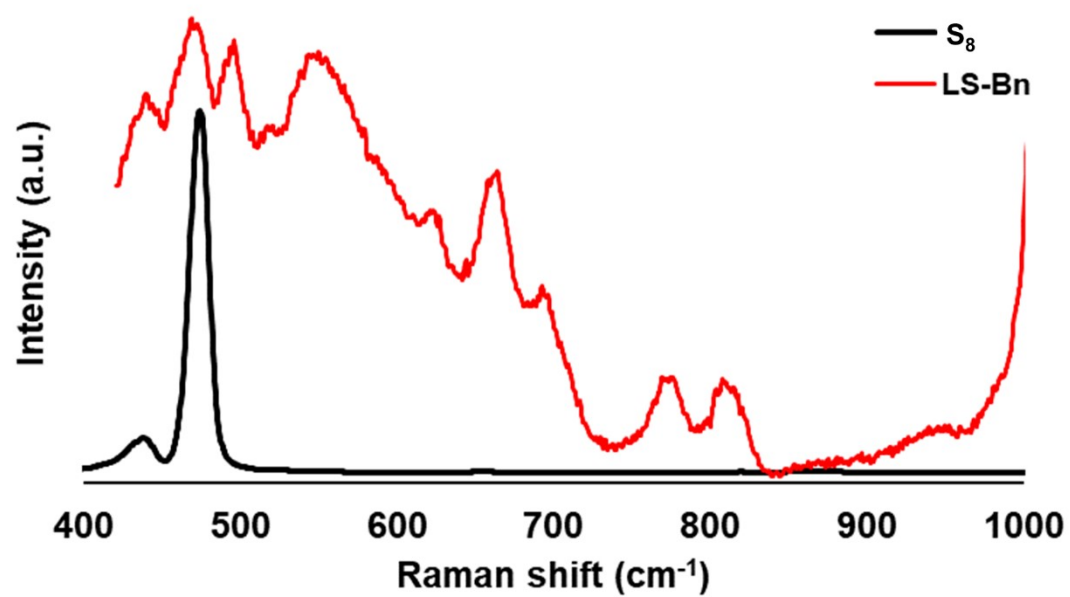

**Figure S10.** Raman spectra of S<sub>8</sub> (black) and LS-Bn (red).

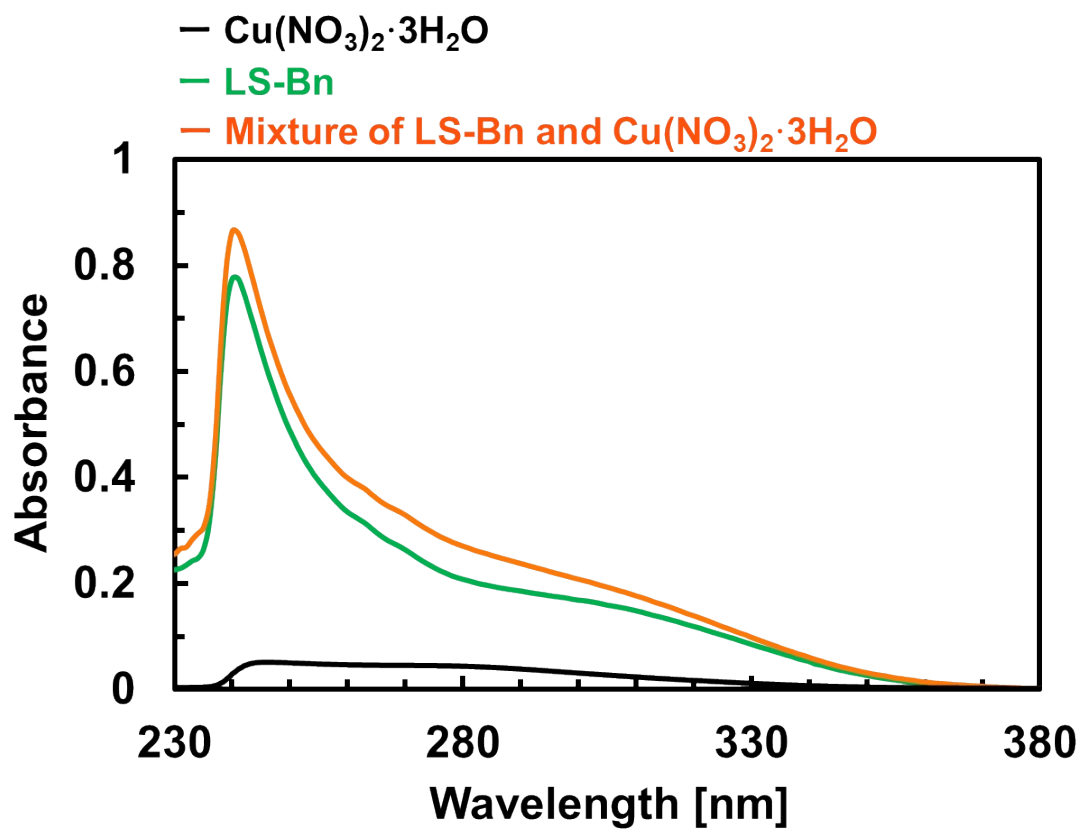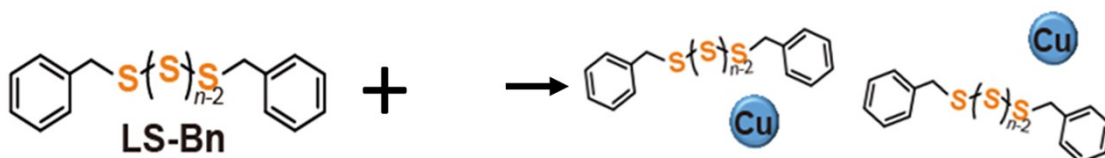

**Figure S11.** UV-Vis spectra of  $\text{Cu}(\text{NO}_3)_2 \cdot 3\text{H}_2\text{O}$  (black), LS-Bn (green), and mixture of LS-Bn and  $\text{Cu}(\text{NO}_3)_2 \cdot 3\text{H}_2\text{O}$  (orange) in  $\text{CHCl}_3/\text{MeOH}$  (4:1) at 25 °C. The concentrations of LS-Bn and  $\text{Cu}(\text{NO}_3)_2 \cdot 3\text{H}_2\text{O}$  were 1.4 and 14  $\mu\text{M}$ , respectively.

#### 4. Preparation of Poly(LS-bpyFe)

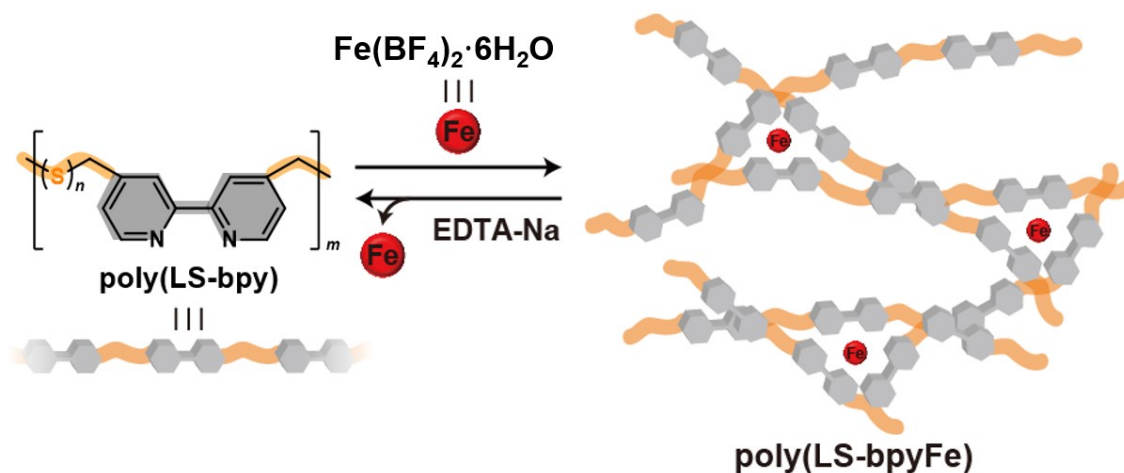

**Scheme S4.** Preparation of poly(LS-bpyFe).

Poly(LS-bpy) (7.5 mg, 21.6  $\mu\text{mol}$  (bpy part)) and Iron(II) tetrafluoroborate hexahydrate ( $\text{Fe}(\text{BF}_4)_2 \cdot 6\text{H}_2\text{O}$  (2.4 mg, 7.19  $\mu\text{mol}$ ) were added to mixed solution of  $\text{CHCl}_3$  (16.0 mL) and MeOH (4.0 mL) and stirred at r.t. for 24 h. Precipitation occurred in the solution during the reaction. The precipitate was collected and dried to obtain poly(LS-(bpy)Fe).

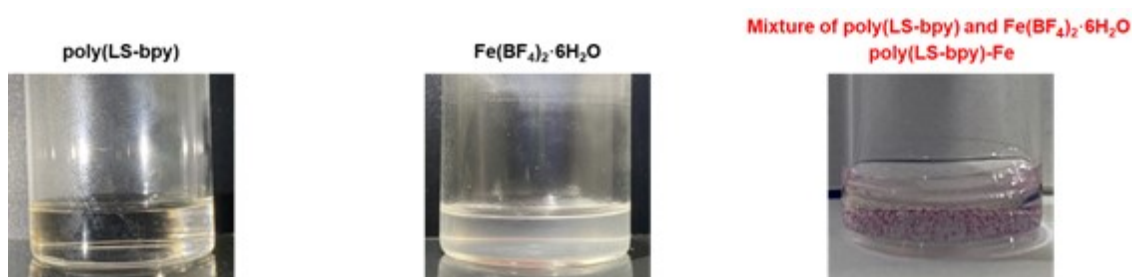

**Figure S12.** Photographs of poly(LS-bpy) (left),  $\text{Fe}(\text{BF}_4)_2 \cdot 6\text{H}_2\text{O}$  (center), and mixture of poly(LS-bpy) and  $\text{Fe}(\text{BF}_4)_2 \cdot 6\text{H}_2\text{O}$  (poly(LS-bpy)Fe) (right) in  $\text{CHCl}_3/\text{MeOH}$  (4:1), respectively.

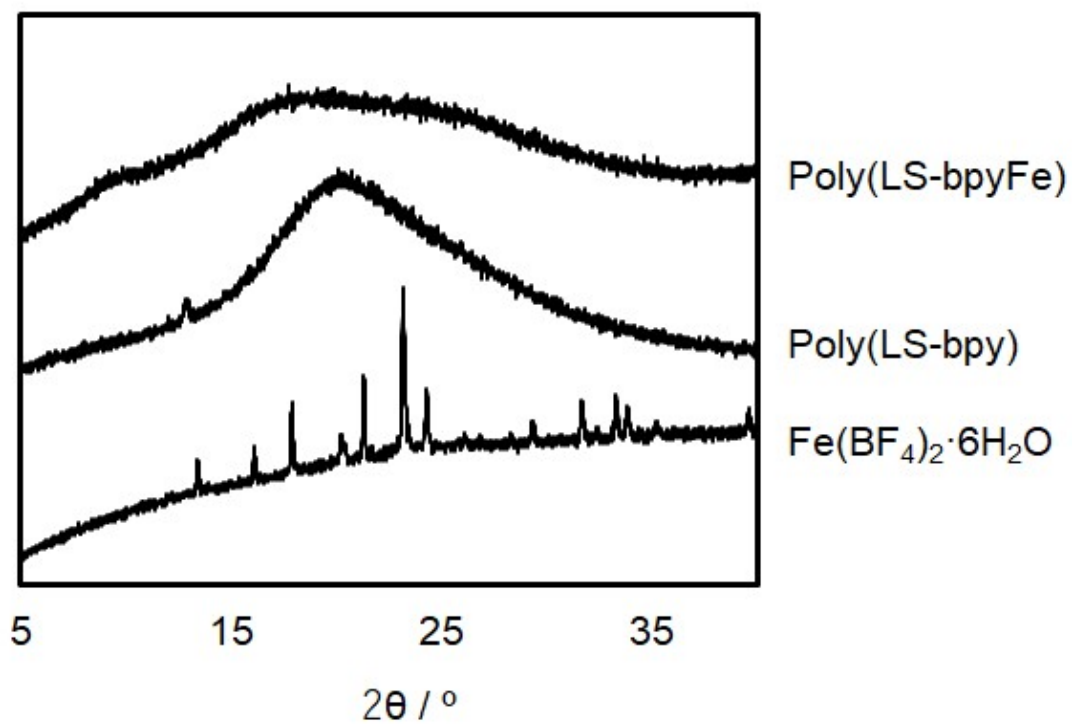

**Figure S13.** XRD patterns of  $\text{Fe}(\text{BF}_4)_2 \cdot 6\text{H}_2\text{O}$ , poly(LS-bpy), and poly(LS-bpyFe). Introduction of Fe(II) into the poly(LS-bpy) was confirmed by the absence of diffraction peaks for neat  $\text{Fe}(\text{BF}_4)_2 \cdot 6\text{H}_2\text{O}$  in the XRPD measurement of poly(LS-bpyFe).



## UV-Vis measurement

### Poly(LS-bpyFe)

To confirm the complex formation of bpy part in poly(LS-bpy) and Fe(II), we performed the UV-Vis measurement of mixture of poly(LS-bpy) and  $\text{Cu}(\text{NO}_3)_2 \cdot 3\text{H}_2\text{O}$ . Mixed solution of  $\text{CHCl}_3$  and MeOH (4:1) of 46.7  $\mu\text{M}$  poly(LS-bpy) was prepared in a UV cuvette (1 cm path length). Aliquots (2.32  $\mu\text{L}$ ) of the mixed solution of  $\text{CHCl}_3$  and MeOH (4:1) solution of 6.04 mM  $\text{Fe}(\text{BF}_4)_2 \cdot 6\text{H}_2\text{O}$  were added to the solution of poly(LS-bpy) in the UV cuvette. After each aliquot addition, the solution was allowed to stand until the absorbance reached a constant value. A new peak appeared at 545 nm due to the addition of  $\text{Fe}(\text{BF}_4)_2 \cdot 6\text{H}_2\text{O}$  (Fig. S12). This peak was also observed in mixture of bpy and  $\text{Fe}(\text{BF}_4)_2 \cdot 6\text{H}_2\text{O}$  (Fig. S13). These results indicate that poly(LS-bpy) forms a complex by the coordination bond between bpy in poly(LS-bpy) and Fe.

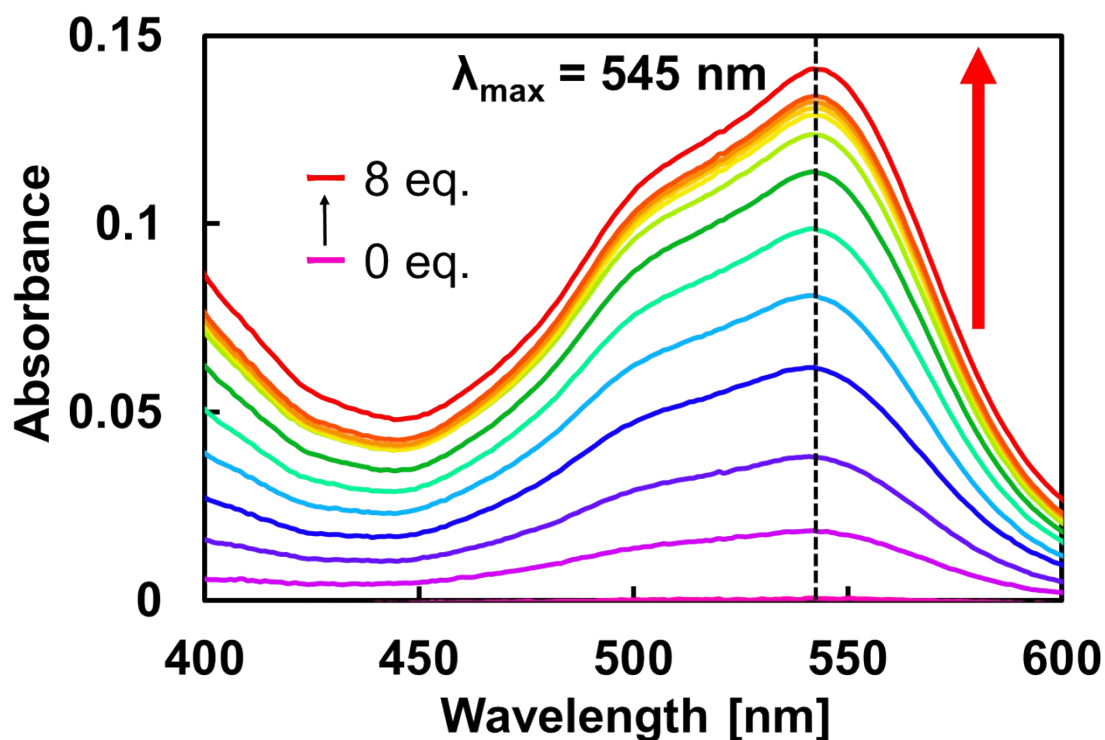

**Figure S14.** UV-Vis absorption spectra of addition of aliquots (2.32  $\mu\text{L}$ ) of 6.04 mM  $\text{Fe}(\text{BF}_4)_2 \cdot 6\text{H}_2\text{O}$   $\text{CHCl}_3/\text{MeOH}$  (4:1) solution to the 46.7  $\mu\text{M}$  poly(LS-bpy)  $\text{CHCl}_3/\text{MeOH}$  (4:1) solution at 25  $^\circ\text{C}$ .

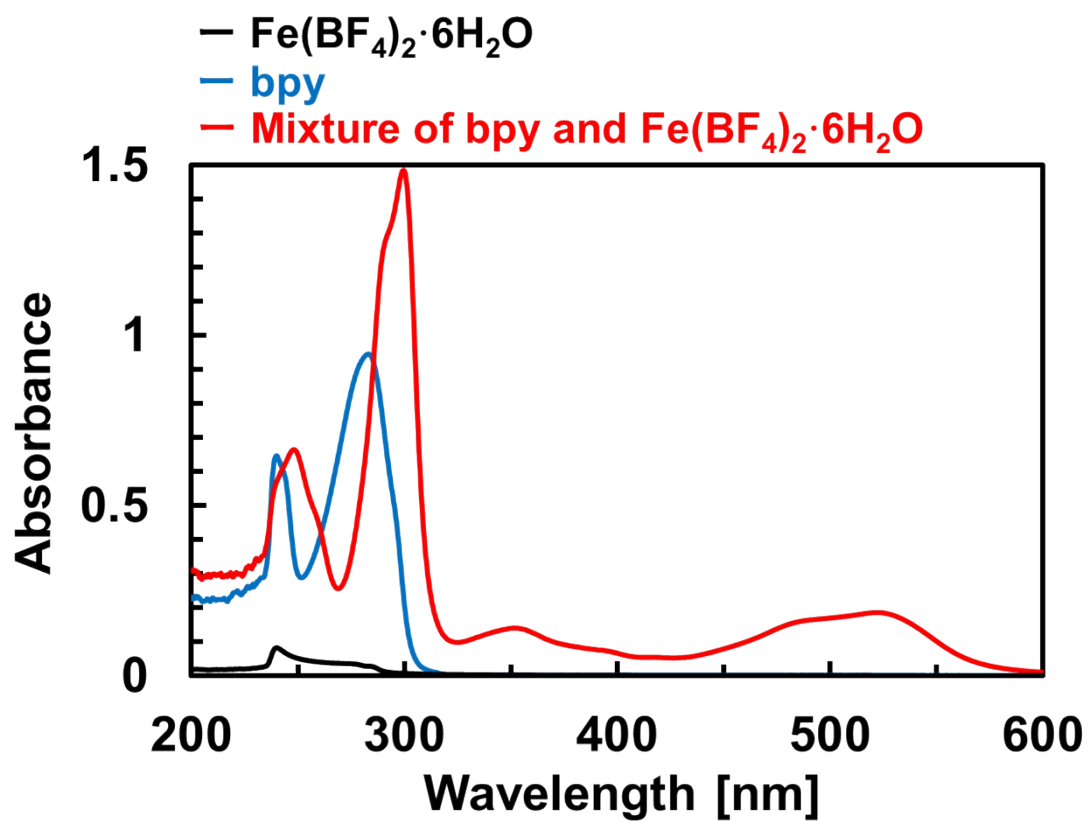

**Figure S15.** UV-Vis spectra of Fe(BF<sub>4</sub>)<sub>2</sub>·6H<sub>2</sub>O (black), bpy (blue), and mixture of bpy and Fe(BF<sub>4</sub>)<sub>2</sub>·6H<sub>2</sub>O (red) in CHCl<sub>3</sub>/MeoH (4:1) at 25 °C. The concentrations of bpy and Fe(BF<sub>4</sub>)<sub>2</sub>·6H<sub>2</sub>O were 66.7 μM and 7.55 mM, respectively.

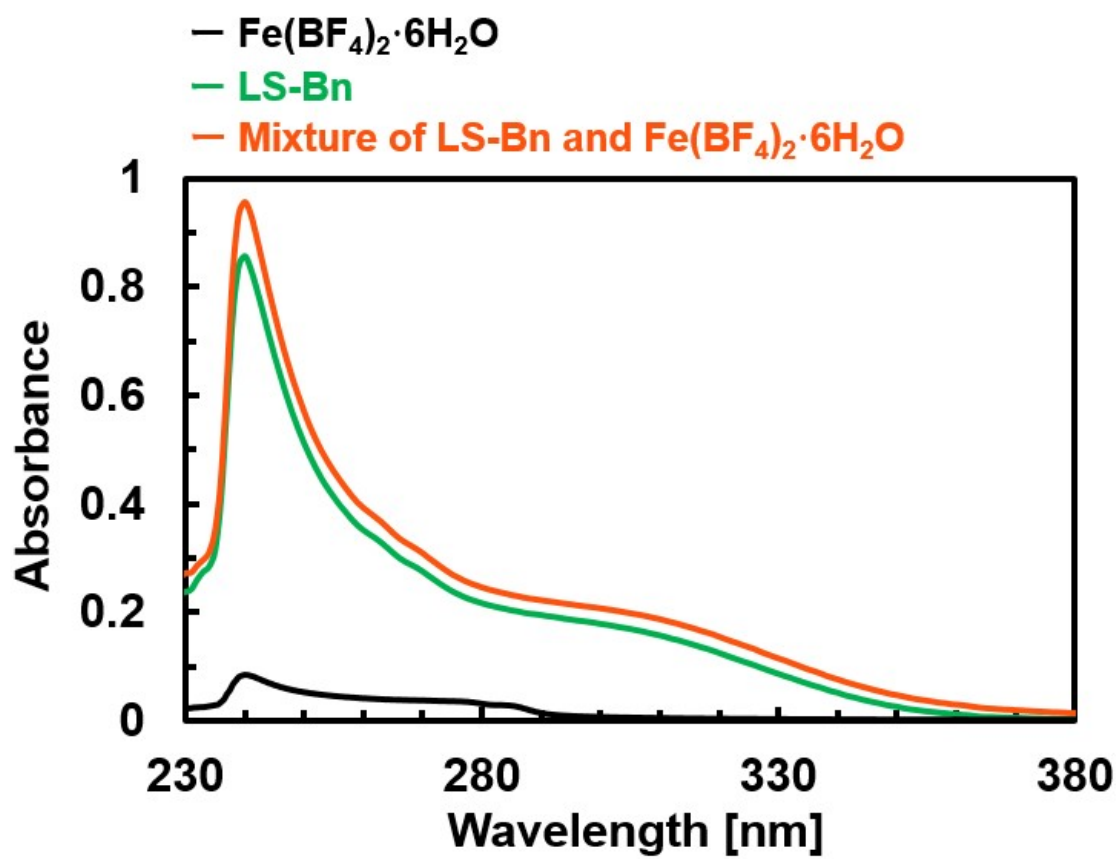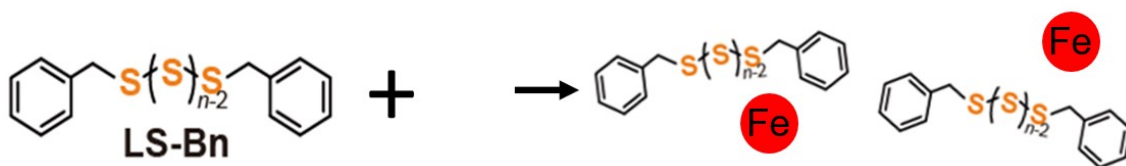

**Figure S16.** UV-Vis spectra of  $\text{Cu}(\text{NO}_3)_2 \cdot 3\text{H}_2\text{O}$  (black), LS-Bn (green), and mixture of LS-Bn and  $\text{Cu}(\text{NO}_3)_2 \cdot 3\text{H}_2\text{O}$  (red) in  $\text{CHCl}_3/\text{MeOH}$  (4:1) at 25 °C. The concentrations of LS-Bn and  $\text{Cu}(\text{NO}_3)_2 \cdot 3\text{H}_2\text{O}$  were 47.5 and 7.55  $\mu\text{M}$ , respectively.

## 5. Disassembly and re-assembly of poly(LS-bpyCu)

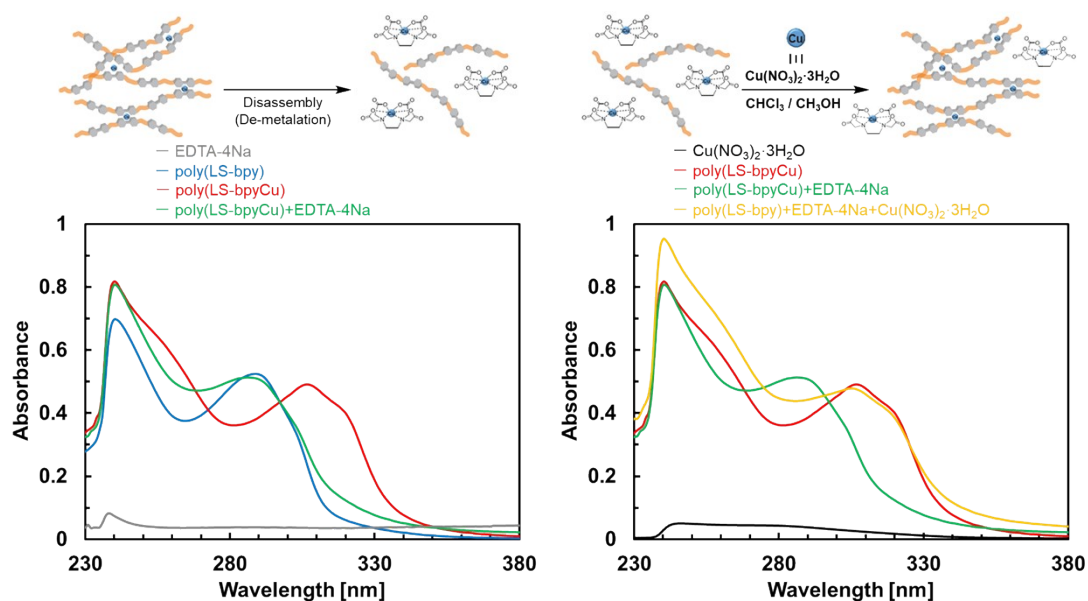

**Figure S17.** UV-Vis spectra of EDTA-Na (gray), 46.7  $\mu\text{M}$  poly(LS-bpy) (blue), 40  $\mu\text{M}$  poly(LS-bpyCu) (red), a mixture of poly(LS-bpyCu) and 10 eq. of EDTA-Na (green), 14  $\mu\text{M}$   $\text{Cu}(\text{NO}_3)_2 \cdot 5\text{H}_2\text{O}$  (black), and re-assembled poly(LS-bpyCu) where 0.6 eq. of  $\text{Cu}(\text{NO}_3)_2 \cdot 5\text{H}_2\text{O}$  was added to the filtrate of the mixture of poly(LS-bpy)<sub>2</sub>Cu and EDTA-Na (orange) in  $\text{CHCl}_3/\text{CH}_3\text{OH} = 4:1$  solution. The increase in the overall absorbance in the UV-Vis spectra is due to the absorption of EDTA-Na or  $\text{Cu}(\text{NO}_3)_2 \cdot 3\text{H}_2\text{O}$ . For samples with Abs. greater than 1, the samples were diluted and measured to reduce absorbance to  $\sim 1$ .

## 6. DSC and TGA of poly(LS-bpyCu)

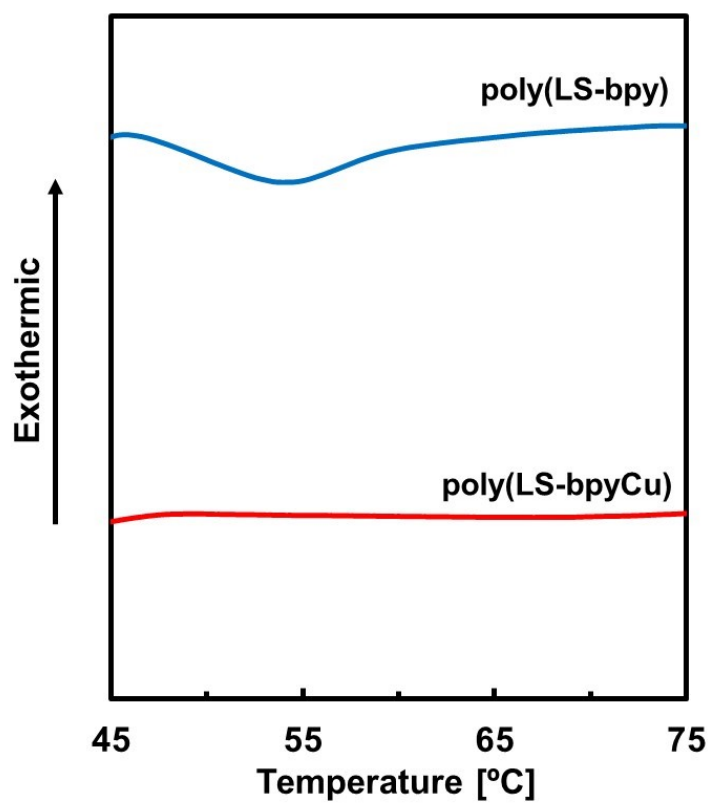

**Figure S18.** DSC profiles of poly(LS-bpy) (blue) and poly(LS-bpyCu) (red).

In the TG profiles, the weight loss of poly(LS-bpyCu) was in two steps, 95 and 249 °C. Pyrolysis-GC-MS measurements were performed at 100 °C to investigate the compounds decomposing in the first step. In the pyrolysis-GC-MS profiles of poly(LS-bpyCu), a peak of  $\text{O}_2$  ( $m/z = 32$ ) when nitric acid decomposes was observed (Fig. S17). The peak of  $\text{O}_2$  ( $m/z = 32$ ) was also observed in the pyrolysis-GC-MS profiles of nitric acid (Fig S18). These results indicated that the weight loss in the first step was due to nitrate ions coordinated to Cu(II). The decomposition temperature of poly(LS-bpyCu) was higher than that of poly(LS-bpy).

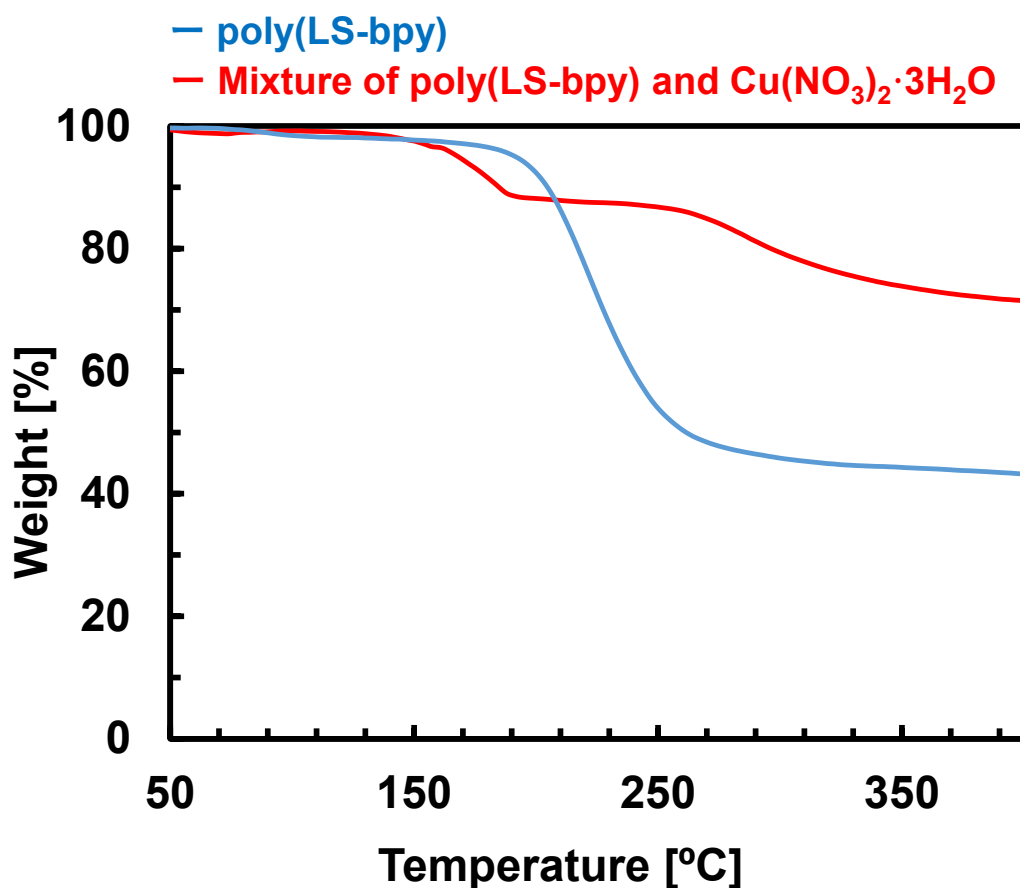

Figure S19. TG profiles of poly(LS-bpy) (blue) and poly(LS-bpyCu) (red).

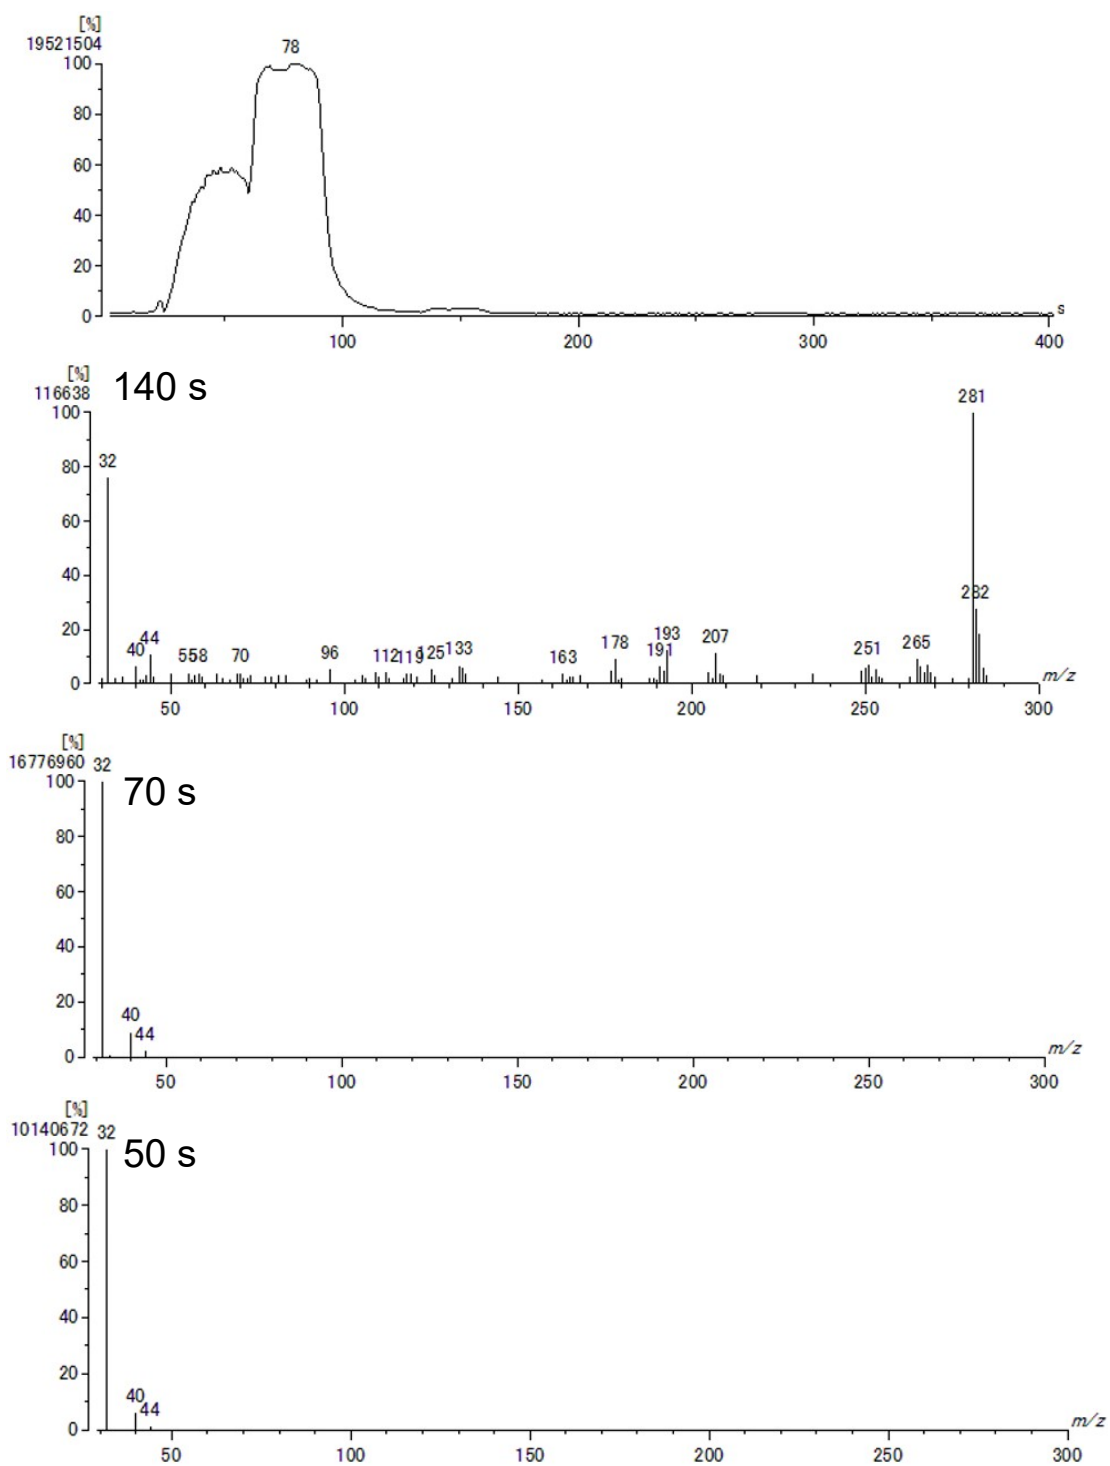

**Figure S20.** Pyrolysis-GC-MS profiles of poly(LS-bpyCu).

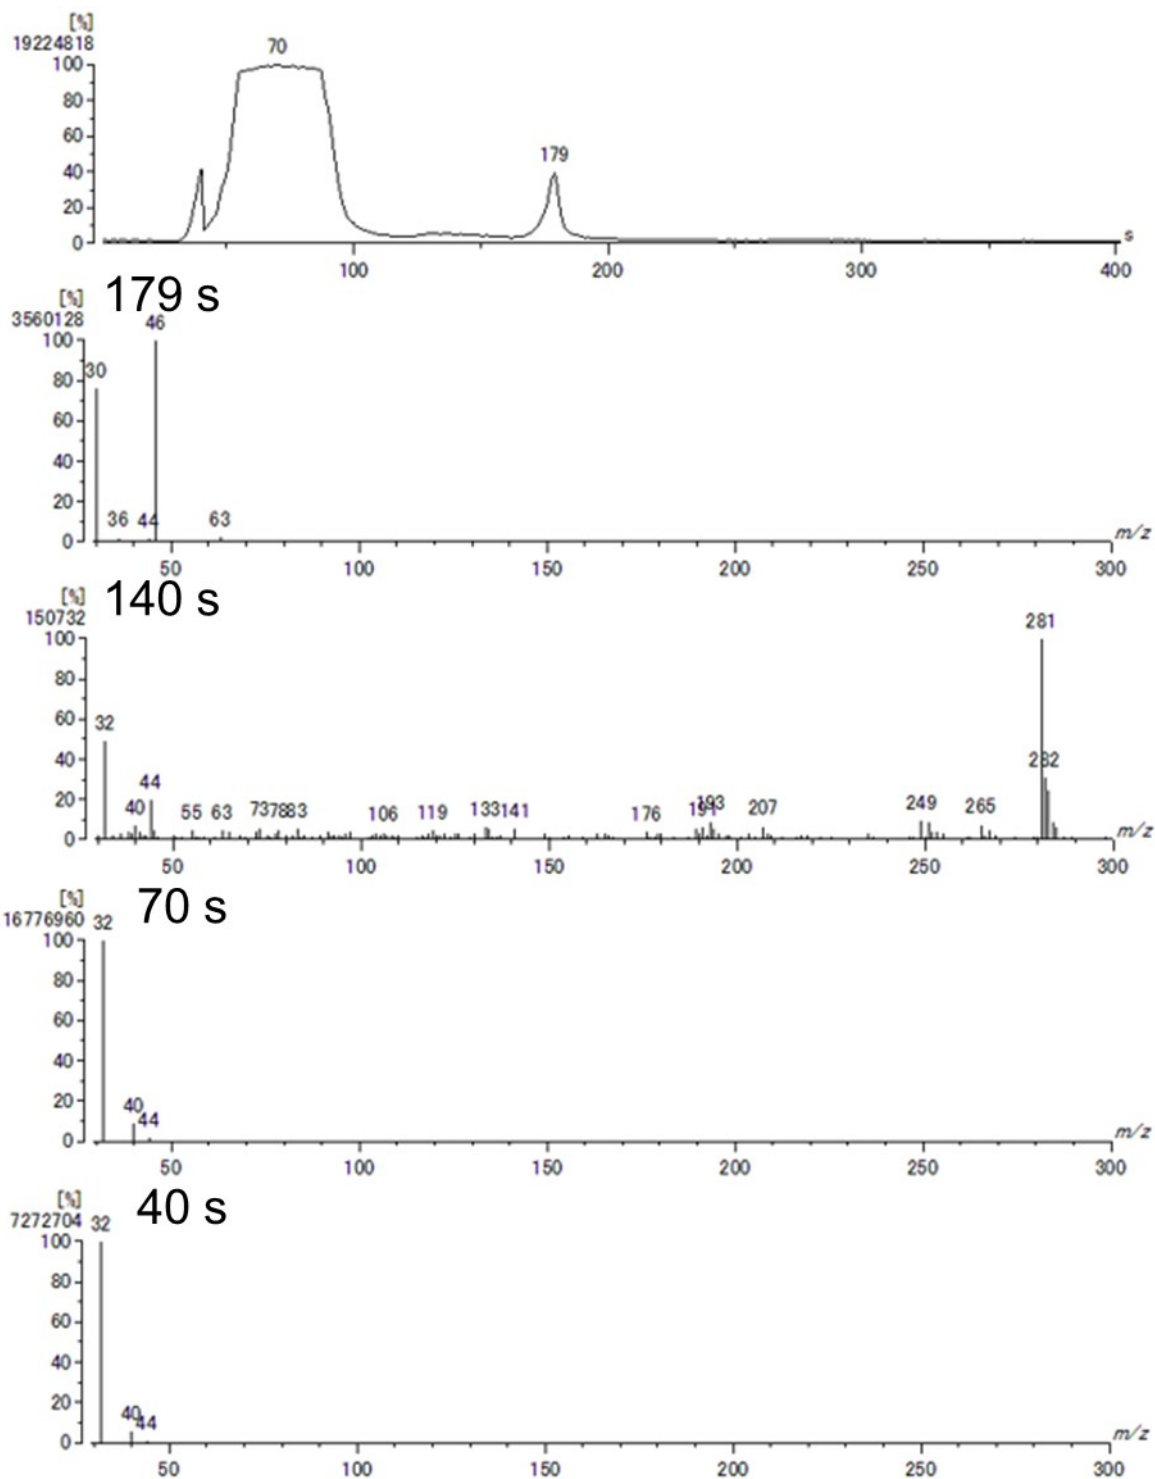

**Figure S21.** Pyrolysis-GC-MS profiles of nitric acid.
